# Supplementary material for: p53‐Dependent Mitochondrial Compensation in Heart Failure With Preserved Ejection Fraction
Source: PubMed Central journal article supplement — J Am Heart Assoc. 2022 Jun 3;11(11):e024582. doi: 10.1161/JAHA.121.024582 (PMC9238719; doi:10.1161/jaha.121.024582), 2022-06-03
Supplement: JAH3-11-e024582-s001.pdf [file JAH3-11-e024582-s001.pdf]

# **SUPPLEMENTAL MATERIAL**

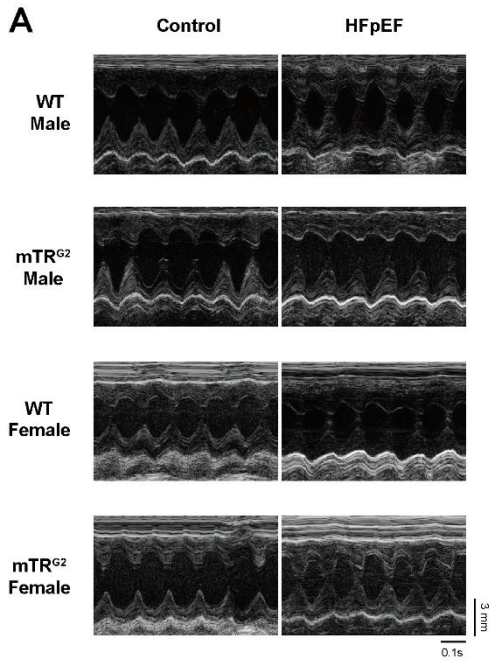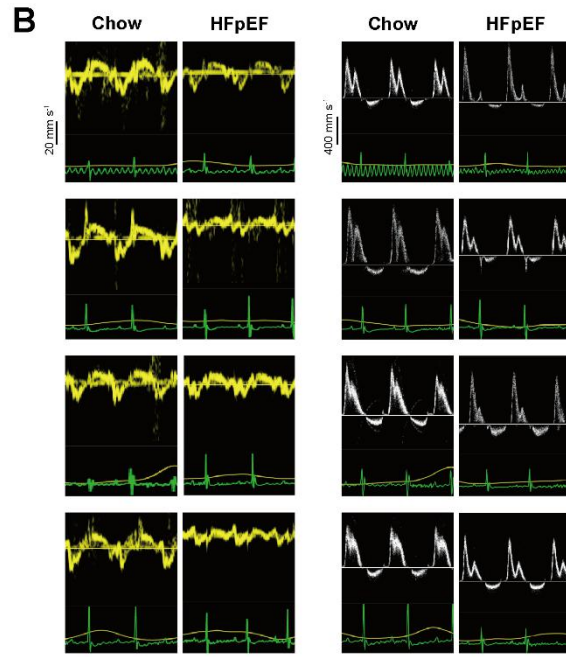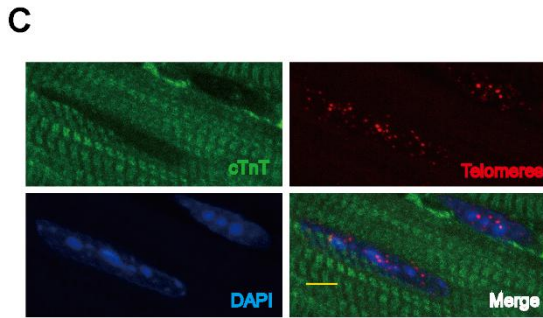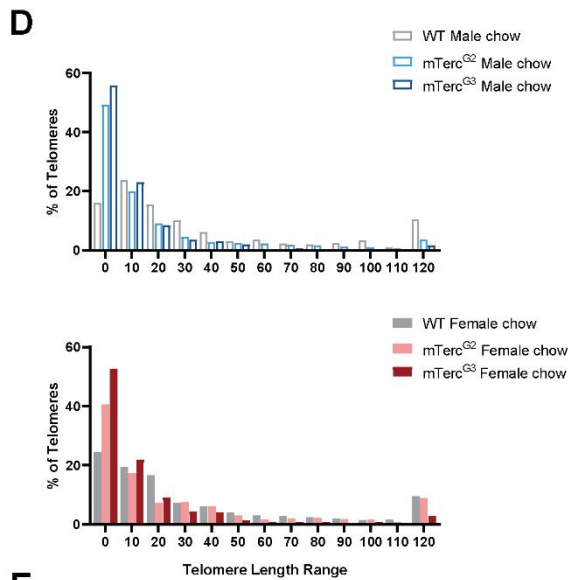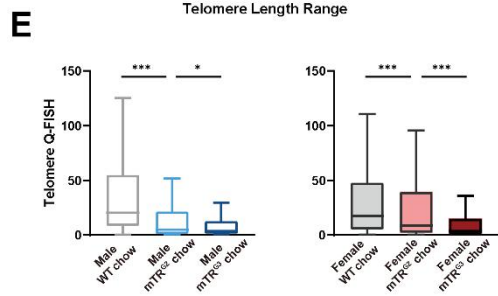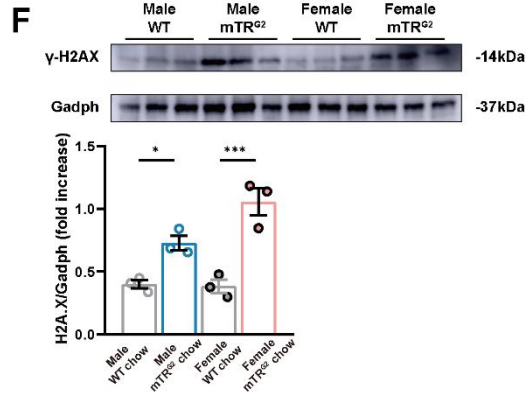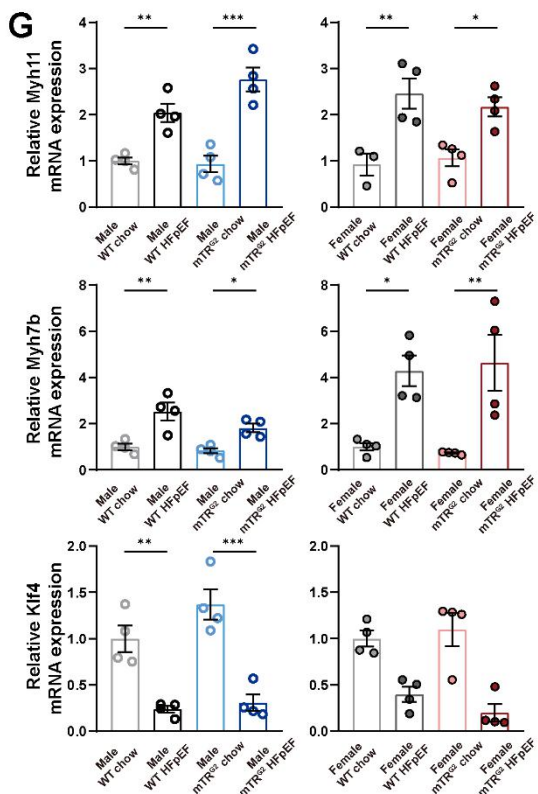

**Figure S1. Functional and molecular characterization of WT and mTRG2 animals challenged with HFD + L-NAME diet.**

**A and B**, Representative left ventricular M-mode echocardiographic and pulsed-wave Doppler (left) and tissue Doppler (right) tracings. **C**, Representative micrographs of quantitative fluorescence *in situ* hybridization (Q-FISH) staining of left murine ventricles. Scale bar is 5 $\mu$ m. **D and E**, Cardiomyocyte telomere length distribution and average telomere lengths are shown (n = 3 mice per group; male WT-chow n = 691; male mTR<sup>G2</sup>-chow n = 849; male mTR<sup>G3</sup>-chow n = 859; female WT-chow n = 782; female mTR<sup>G2</sup>-chow n = 915; female mTR<sup>G3</sup>-chow n = 920). **F**, Representative immunoblots of  $\gamma$ -H2A.X are shown. Histone 3 used as loading control. Densitometric quantifications are shown as mean  $\pm$  SEM (n = 3 per group). (**G through I**), mRNA expression levels of *Myh11*, *Myh7b* and *Klf4* in isolated AMVMs (n = 4 per group). Data are shown as mean  $\pm$  SEM. Kruskal-Wallis test followed by Dunn's multiple-comparisons test was used for panel **E**; One-way ANOVA followed by lognormal processing and/or Tukey's multiple-comparisons test was used for remaining analyses. \**P* < 0.05, \*\**P* < 0.01, \*\*\**P* < 0.001 compared to chow group in the same genotype are shown.

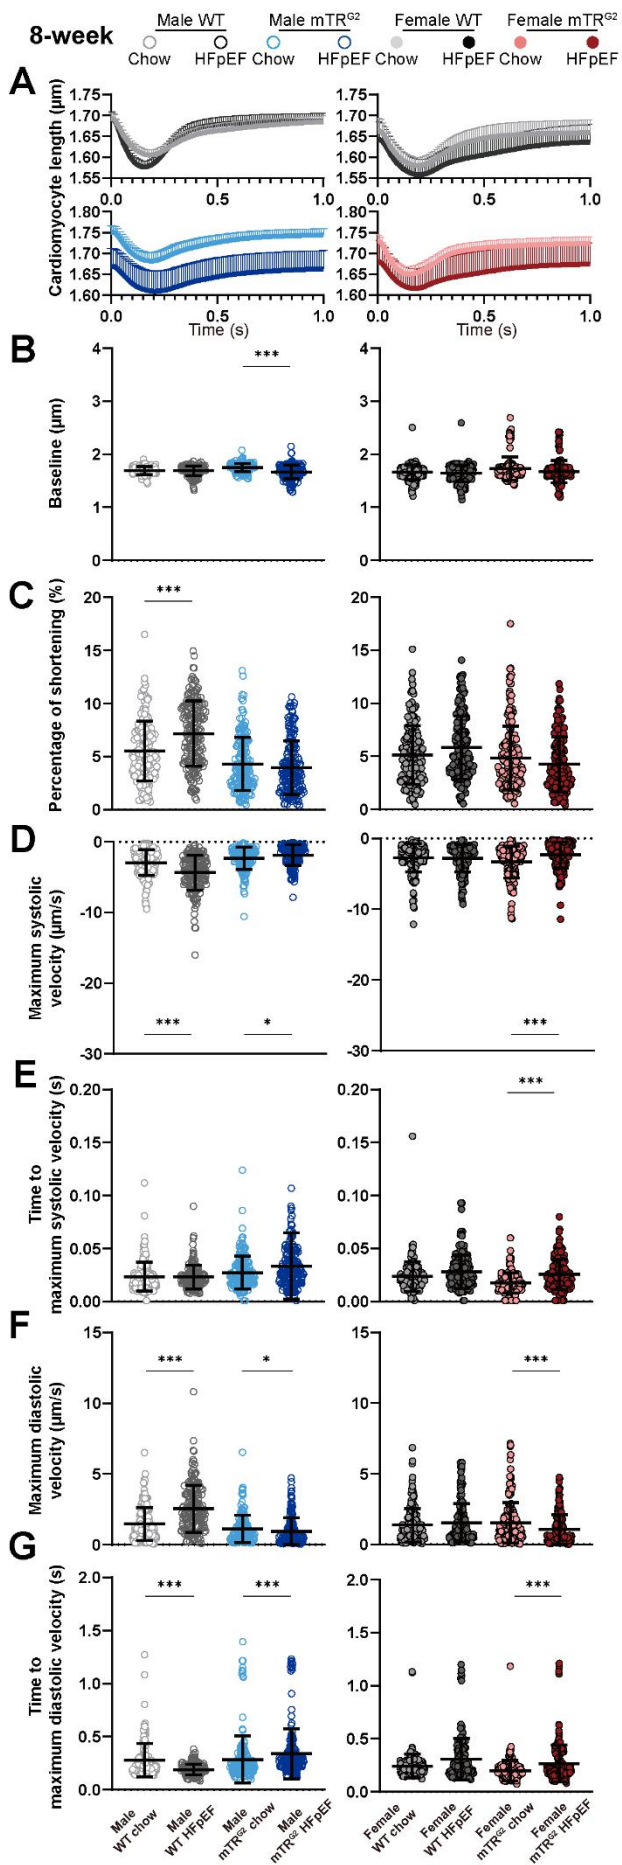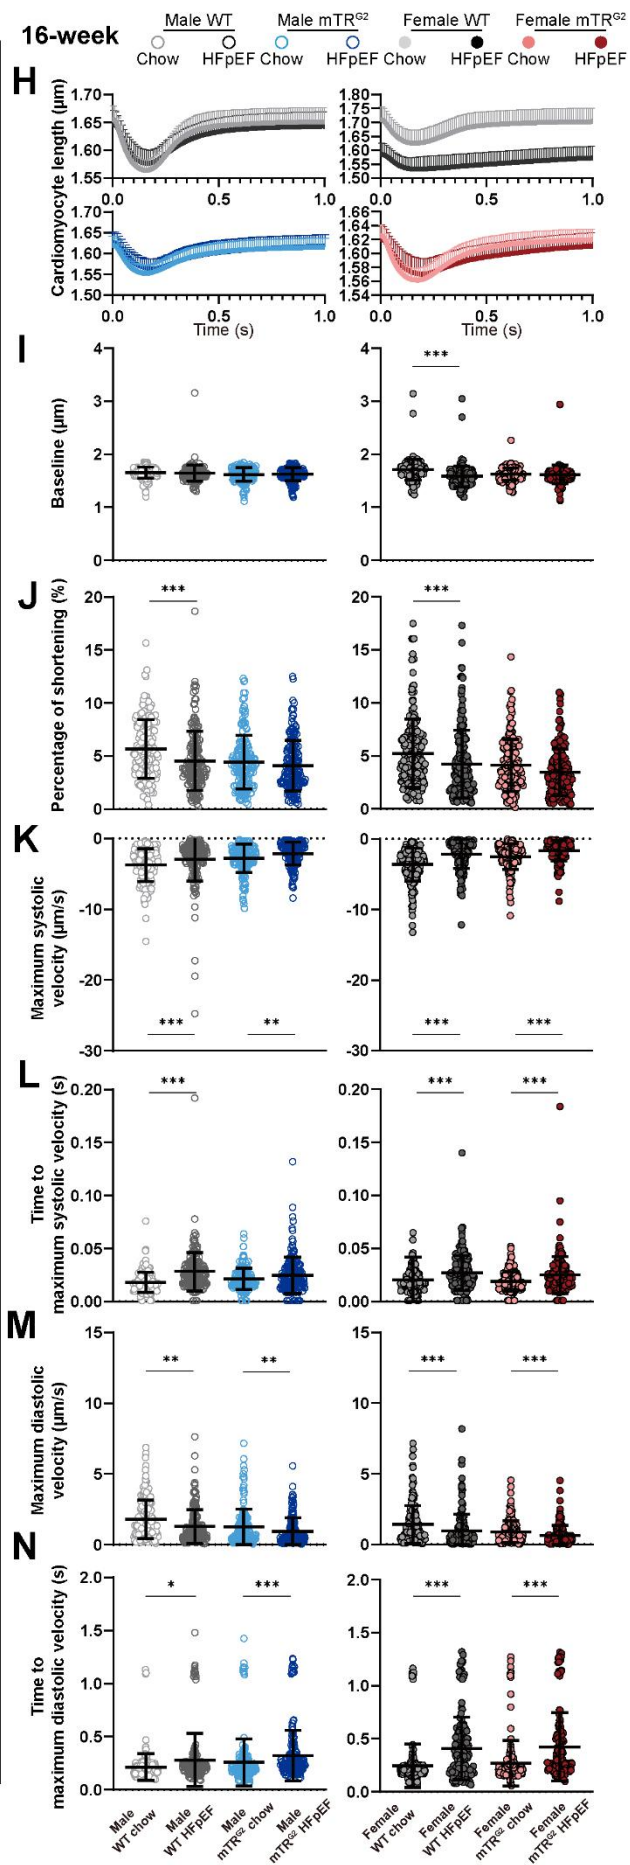

**Figure S2. Evaluation of contractile function in WT- and mTR<sup>G2</sup>-HFpEF cardiomyocytes.**

**A** and **H**, Representative tracings of cardiomyocyte contraction–relaxation in different experimental groups at 8-weeks and 16-weeks. **B** and **I**, Baseline sarcomere length at 8-weeks and 16-weeks. **C** and **J**, Percentage of cardiomyocyte shortening at 8-weeks and 16-weeks. **D** and **K**, Maximum diastolic velocity at 8-weeks and 16-weeks. **E** and **L**, Maximum systolic velocity at 8-weeks and 16-weeks. **F** and **M**, Time to maximum diastolic velocity at 8-weeks and 16-weeks. **G** and **N**, Time to maximum systolic velocity at 8-weeks and 16-weeks.  $n = 6$  mice per group;  $n = 30$  cardiomyocytes per mouse were used. Data are shown as mean  $\pm$  SD. Kruskal-Wallis test followed by Dunn's multiple-comparisons test was used.  $*P < 0.05$ ,  $**P < 0.01$ ,  $***P < 0.001$  compared to chow group in the same genotype are shown.

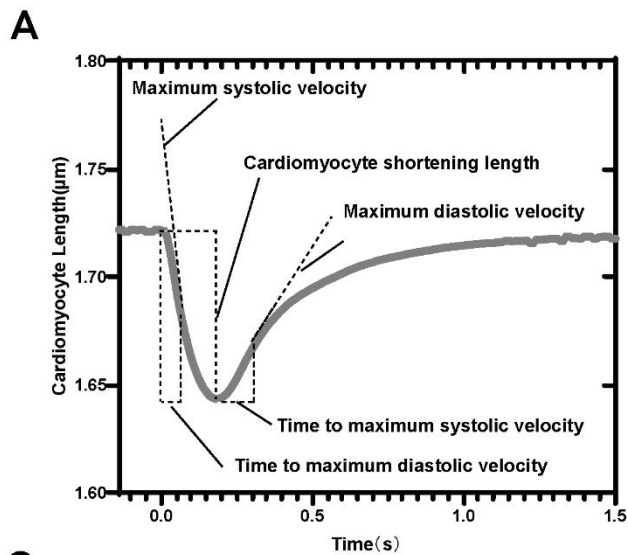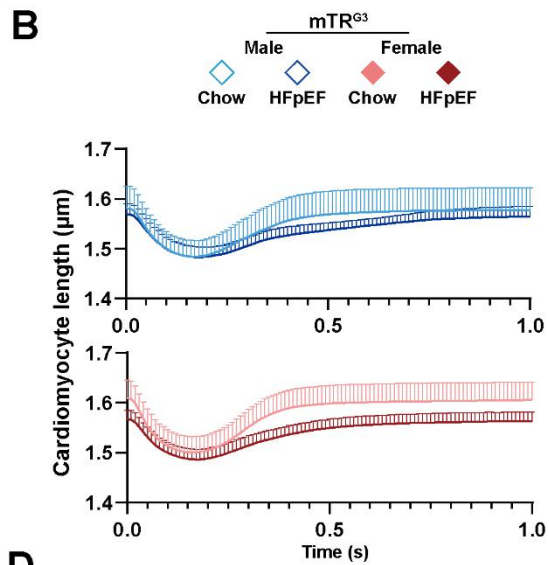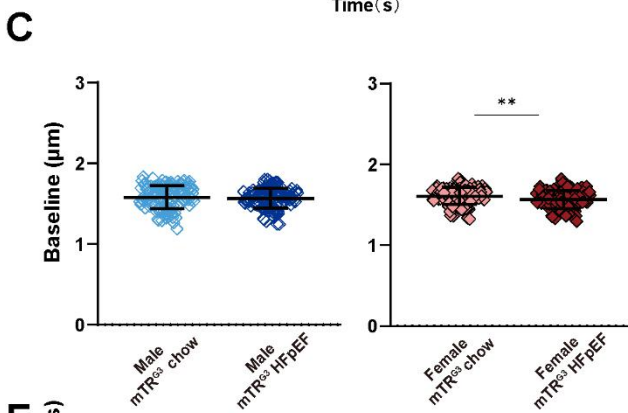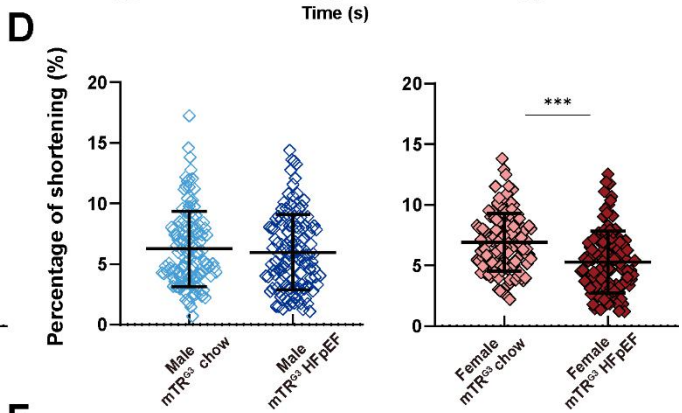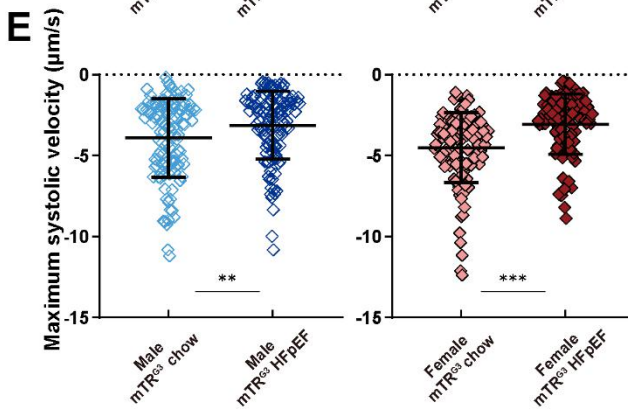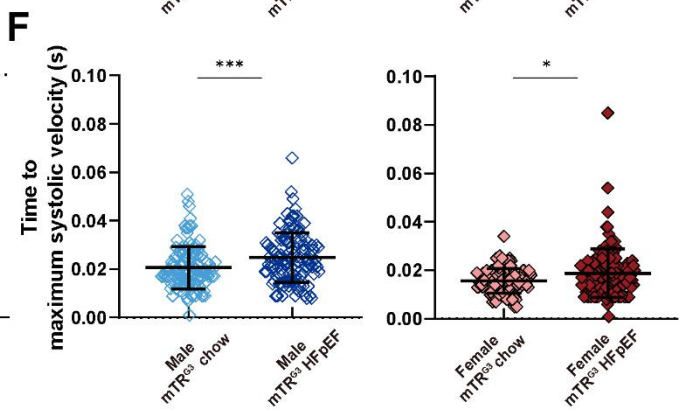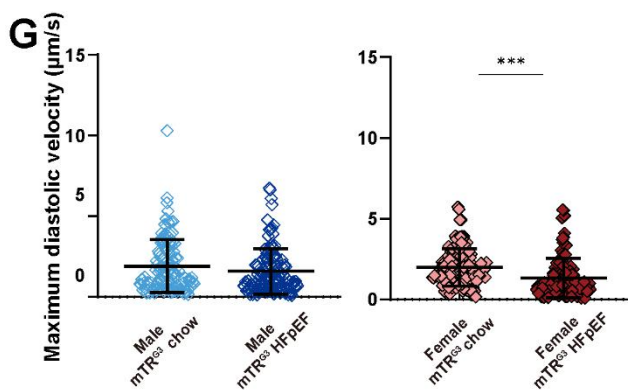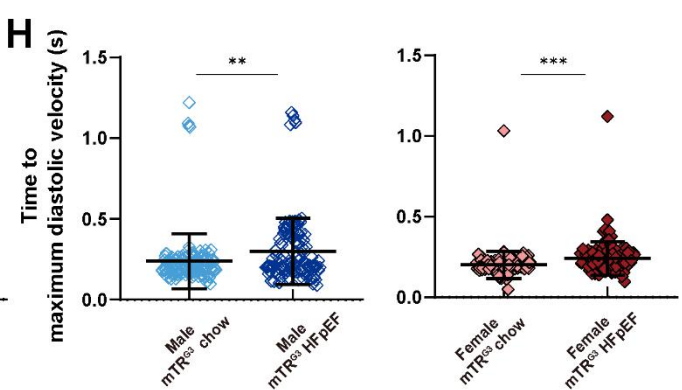

**Figure S3. Evaluation of contractile function in mTR<sup>G3</sup>-HFpEF cardiomyocytes.**

**A**, Ionoptix schematic diagram. **B**, Representative tracings of cardiomyocyte contraction–relaxation of each experimental group at 8-weeks. (**C** through **H**), Baseline sarcomere length, percentage of cardiomyocyte shortening, maximum systolic velocity, time to maximum systolic velocity, maximum diastolic velocity, and time to maximum diastolic velocity at 8-weeks are shown (n = 4 mice per group; n = 30 cardiomyocytes per mouse were used). Data are shown as mean ± SD. Mann-Whitney test was used. \**P* < 0.05, \*\**P* < 0.01, \*\*\**P* < 0.001 compared to chow group in the same genotype are shown.

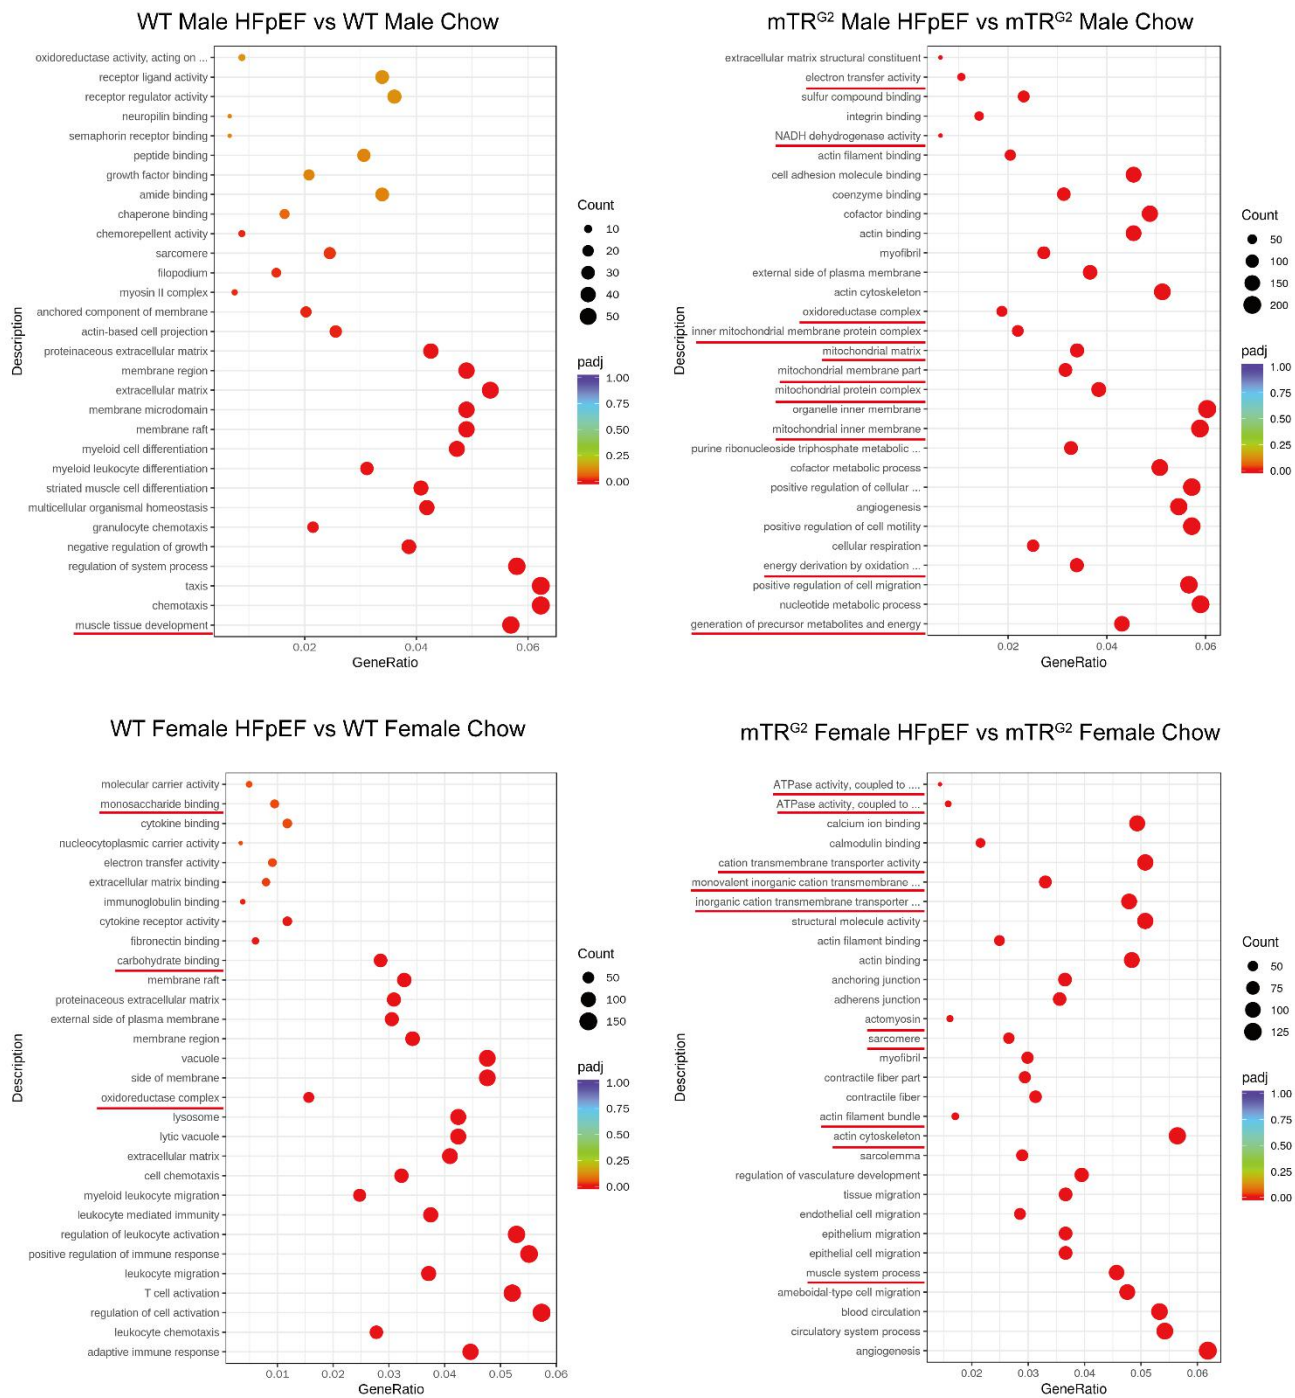

**Figure S4. Gene ontology analysis of differentially expressed genes.**



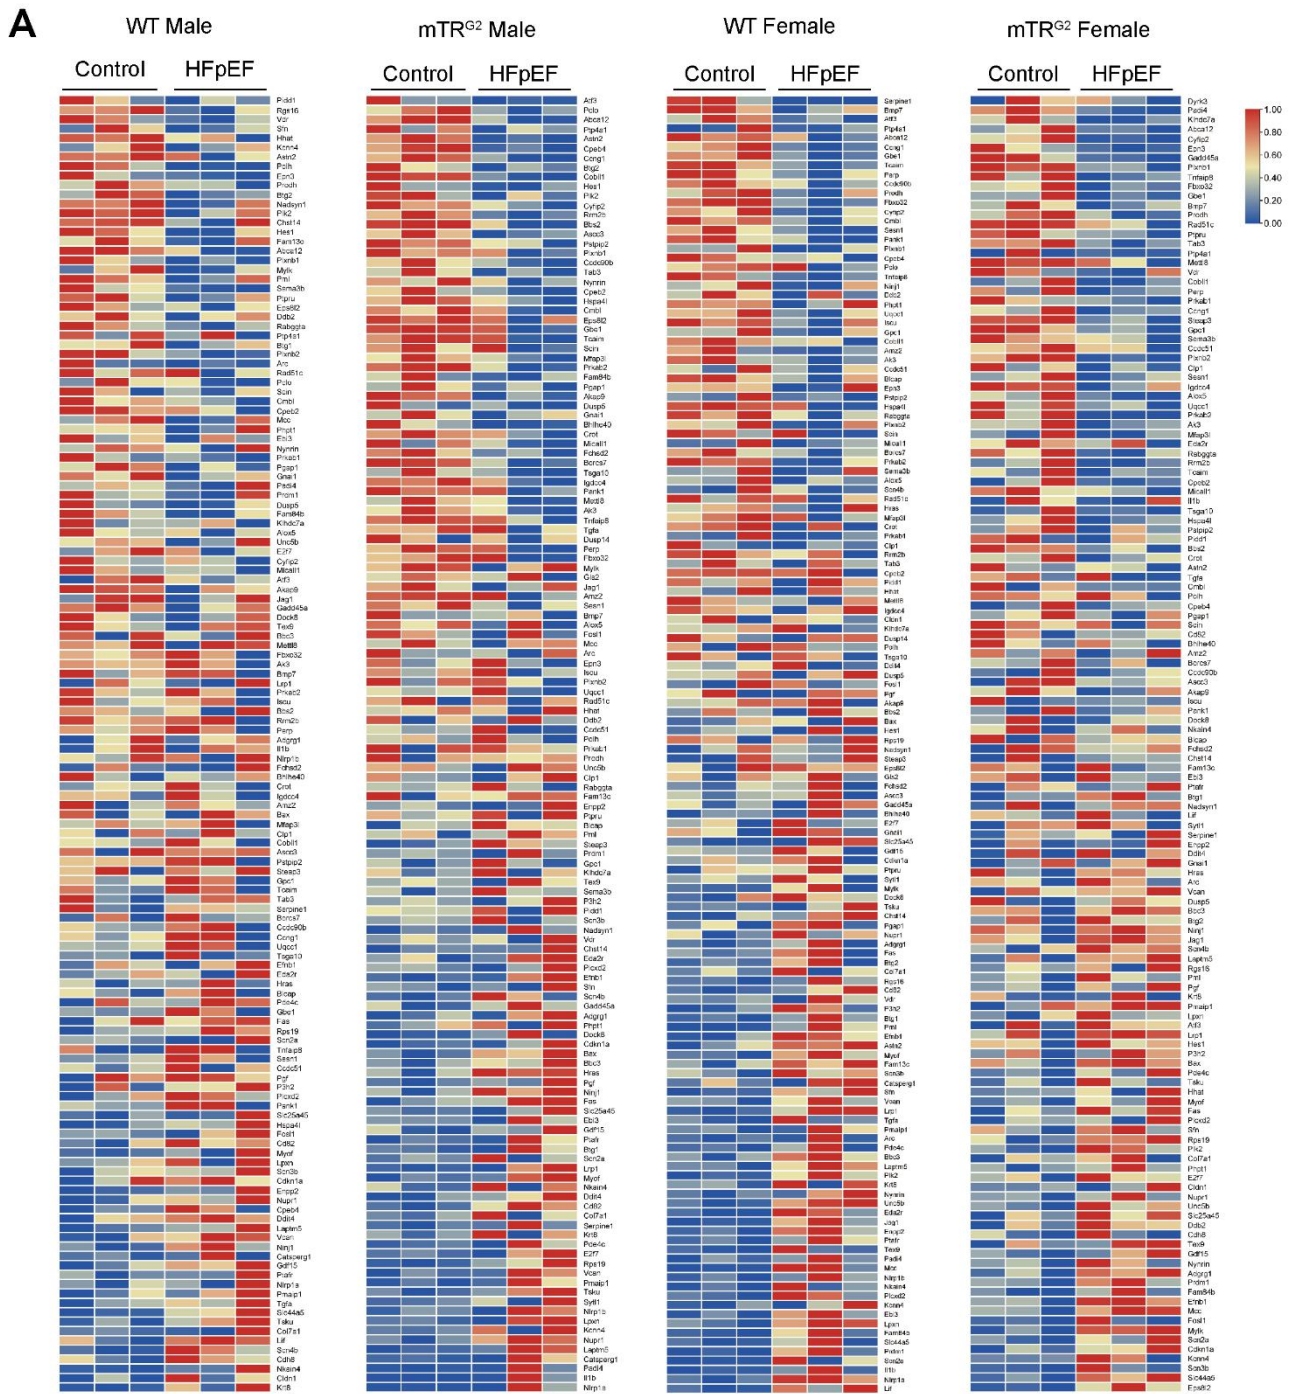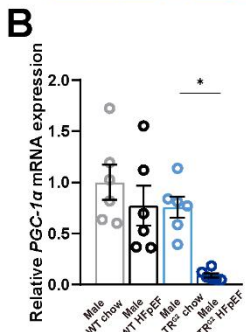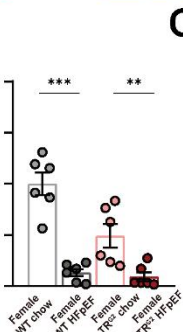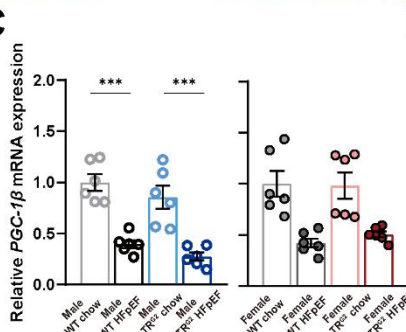

**Figure S5. Transcriptomic profiling of p53-mitochondrial related genes in HFpEF cardiomyocytes.**

**A**, Heatmap of p53 downstream target genes are shown. (n = 3 per group). (**B** through **D**) mRNA levels of *Pgc1- $\alpha$* , *Pgc1- $\beta$*  and *Tfam* measured by RT-qPCR are shown as mean  $\pm$  SEM (n = 6 per group). One-way ANOVA followed by lognormal processing and/or Tukey's multiple-comparisons test was used. \* $P < 0.05$ , \*\* $P < 0.01$ , \*\*\* $P < 0.001$  compared to chow group in the same genotype are shown.

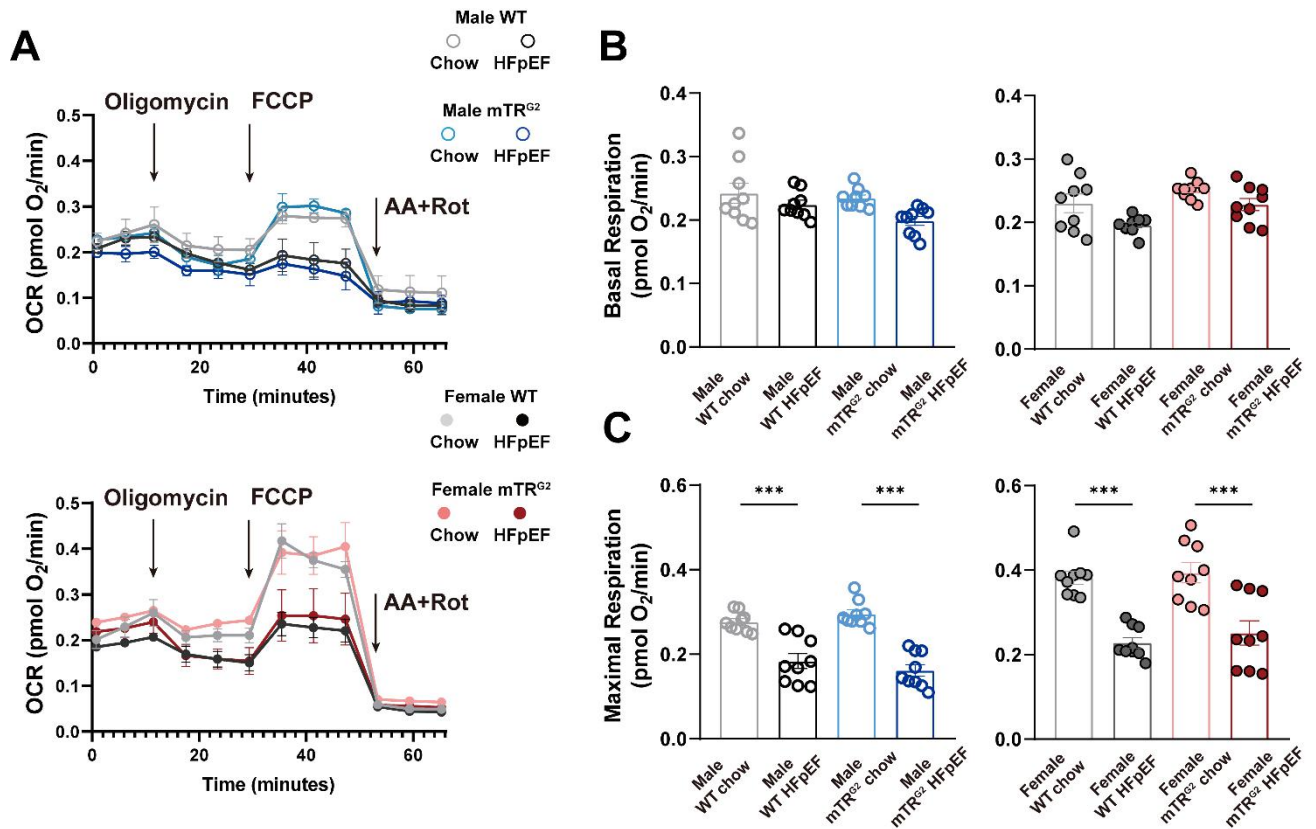

**Figure S6. Evaluation of mitochondrial respiration of 16-weeks mTR<sup>G2</sup>-HFpEF cardiomyocytes.**

**A**, Real-time mitochondrial respiration of isolated AMVMs (n = 3 per group). **B** and **C**, Quantification of basal and maximal OCR of AMVMs. Results are shown as mean ± SEM (n = 3 per group). One-way ANOVA followed by lognormal processing and/or Tukey's multiple-comparisons test was used. \**P* < 0.05, \*\**P* < 0.01, \*\*\**P* < 0.001 compared to chow group in the same genotype.

**A**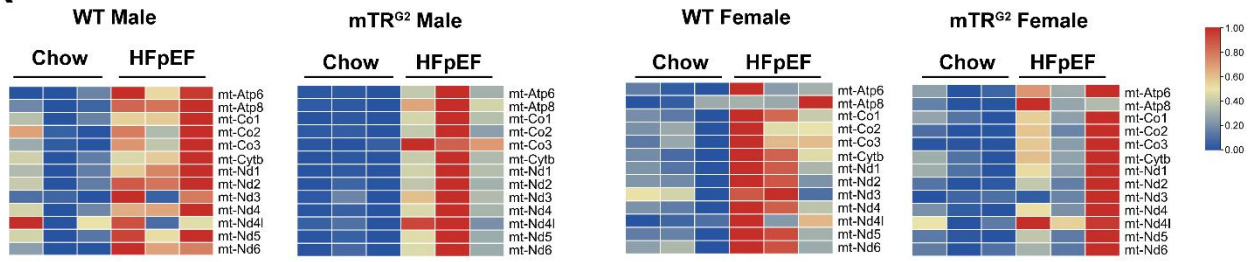**B**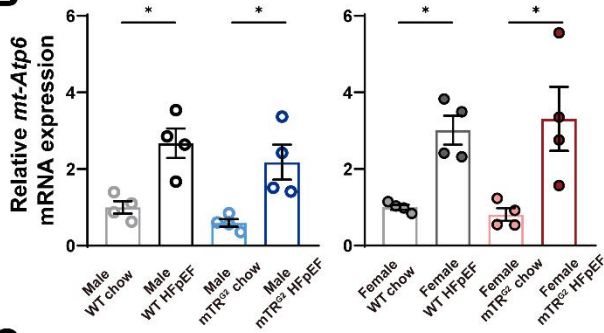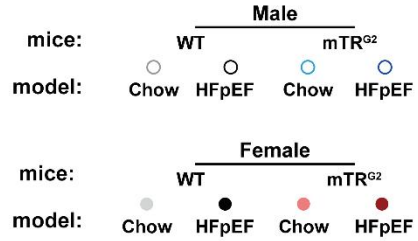**C**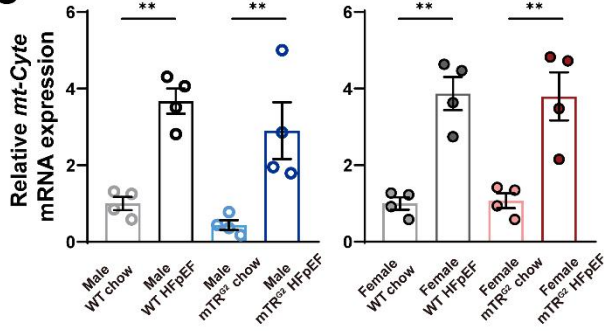**D**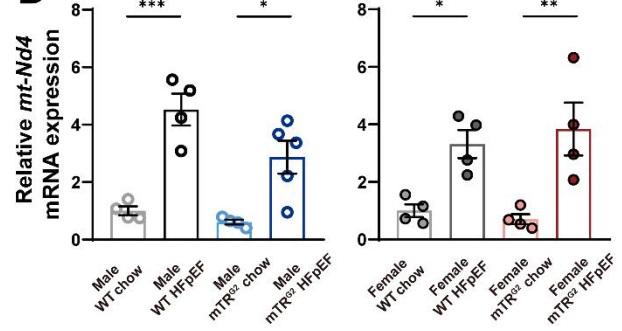**E**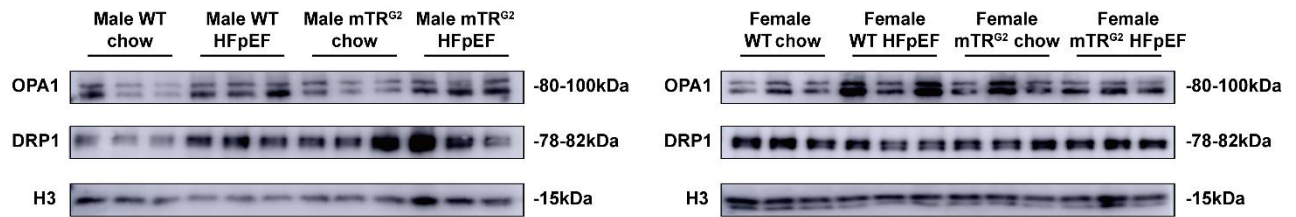**F**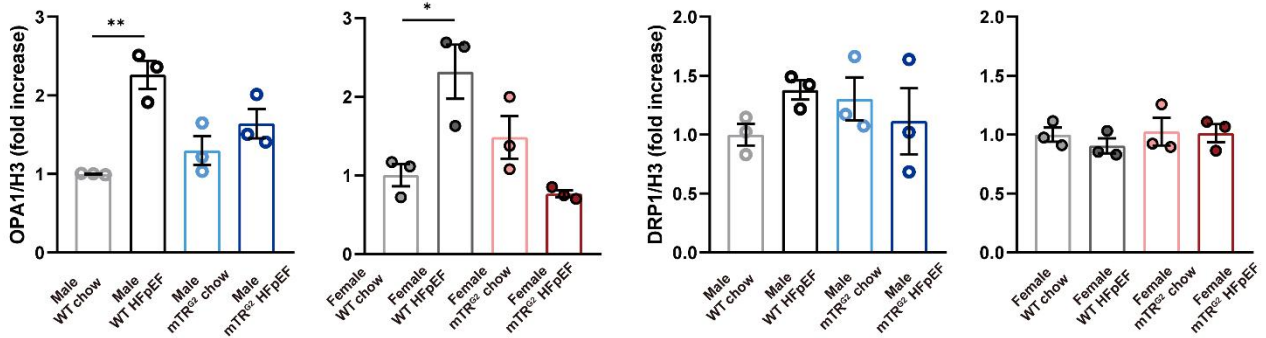

**Figure S7. Upregulation of mitochondrial DNA-encoding genes in 8-weeks mTR<sup>G3</sup>-HFpEF cardiomyocytes.**

**A**, Heatmap of mitochondrial DNA-encoding genes (n = 3 per group). (**B** through **D**), mRNA levels of *mt-Atp6*, *mt-Cyte* and *mt-Nd4* measured by RT-qPCR are shown as mean ± SEM (n = 6 per group). **E**, Representative images of OPA1 and DRP1 expression in AMVMs assayed by immunoblotting. Histone H3 used as loading control. **F**, Densitometric quantifications of OPA1 and DRP1 protein expression. Results are shown as mean ± SEM (n = 3 per group). One-way ANOVA followed by Tukey's multiple-comparisons test was used. \**P* < 0.05, \*\**P* < 0.01, \*\*\**P* < 0.001 compared to chow group in the same genotype are shown.

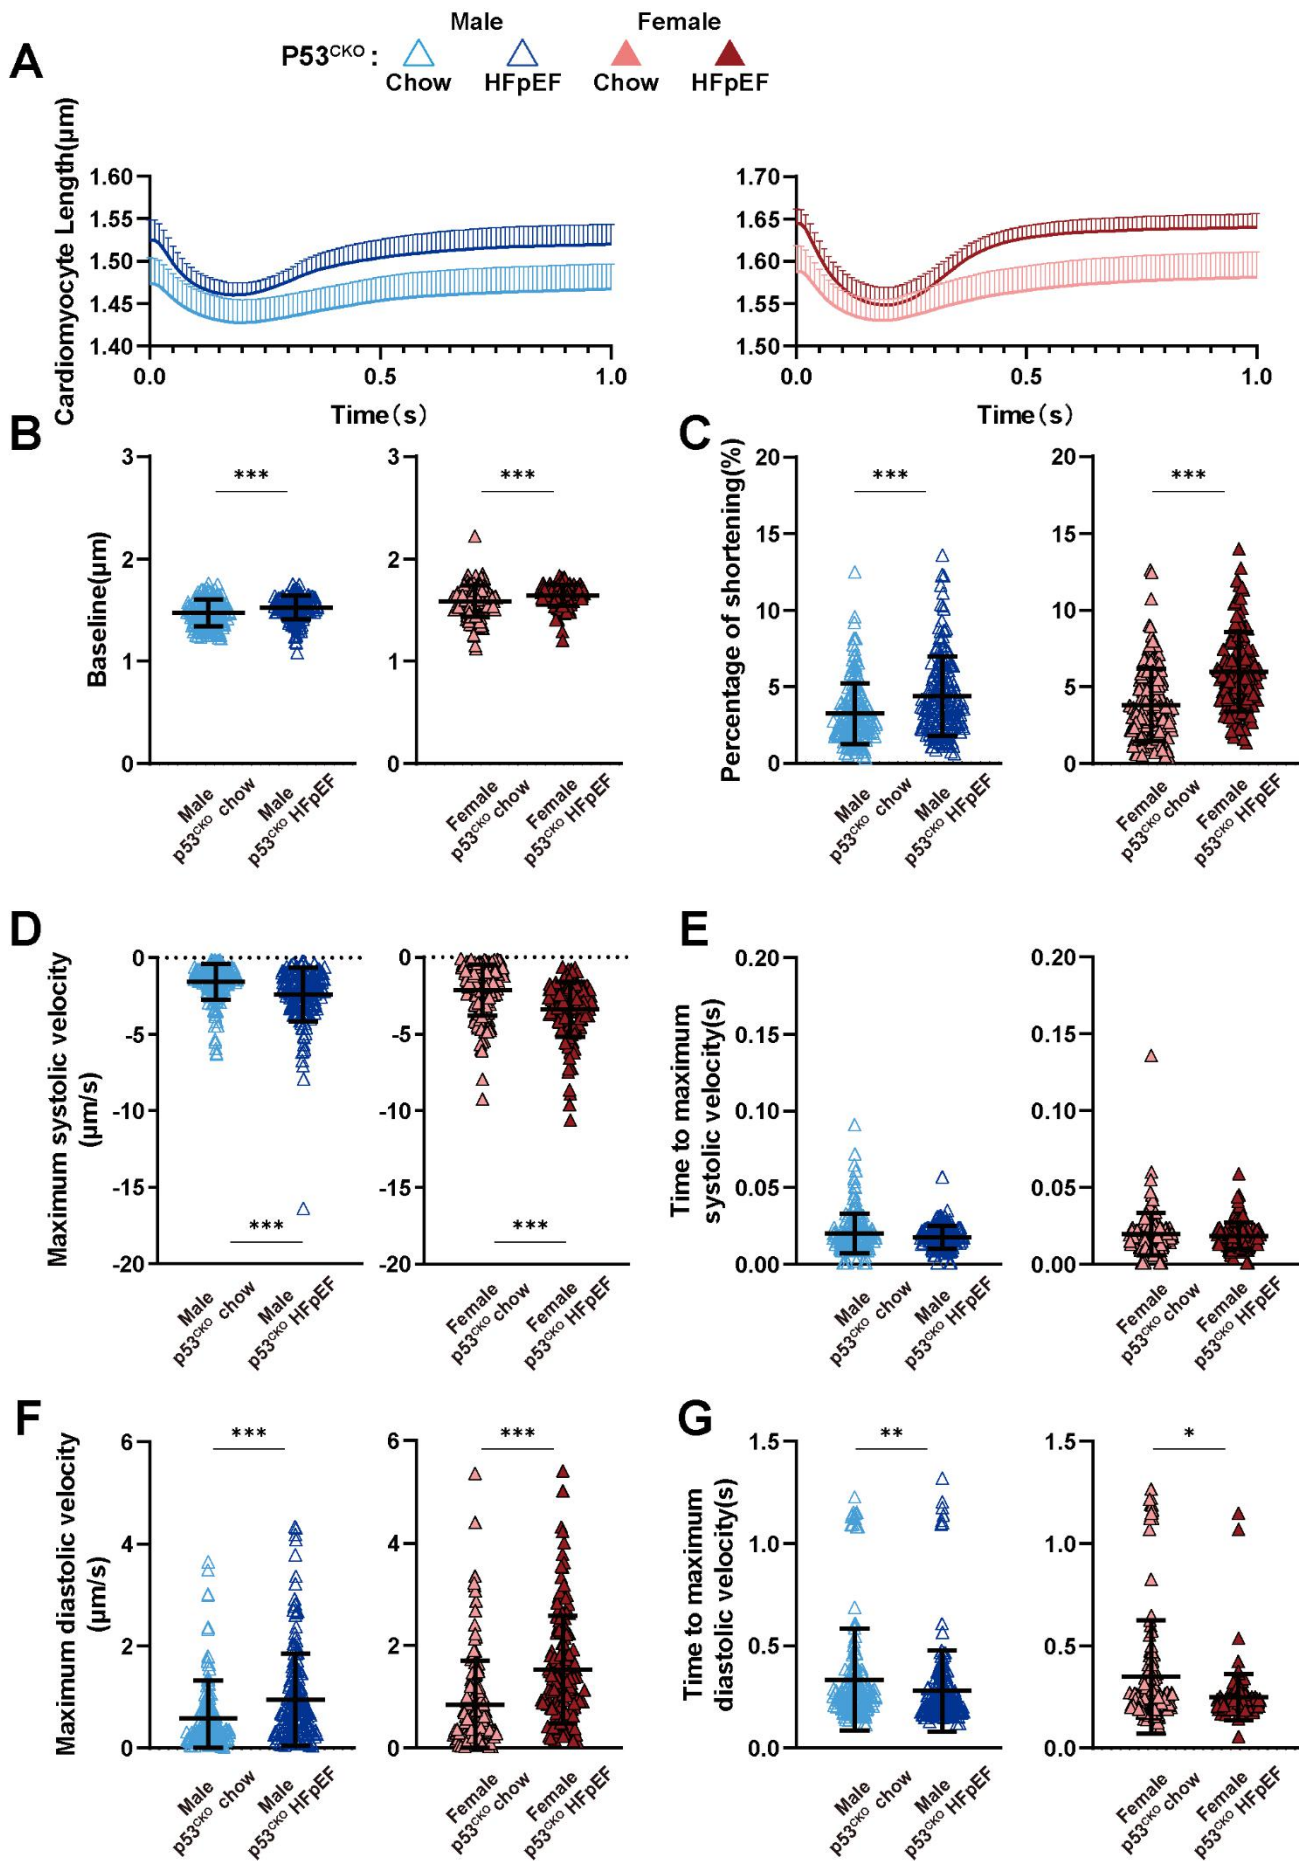

**Figure S8. Evaluation of contractile function in p53<sup>CKO</sup>-HFpEF cardiomyocytes.**

**A**, Representative tracings of cardiomyocyte contraction–relaxation in different experimental groups. Results are shown as mean  $\pm$  SEM. (**B** through **G**), Baseline sarcomere length, percentage of cardiomyocyte shortening, maximum systolic velocity, time to maximum systolic velocity, maximum diastolic velocity, and time to maximum diastolic velocity at 8-weeks are shown (n = 6 mice per male p53<sup>CKO</sup> group, n = 5 per female p53<sup>CKO</sup> group; n = 30 cardiomyocytes per mouse were used). Mann-Whitney test was used. \* $P < 0.05$ , \*\* $P < 0.01$ , \*\*\* $P < 0.001$  compared to chow group are shown.
